# Supplementary material for: Porphyrin–oligothiophene conjugates as additives for P3HT/PCBM solar cells
Source: Royal Society of Chemistry journal article supplement (doi:10.1039/c2jm34037b), 2012-01-01
Supplement: c2jm34037b.pdf [file c2jm34037b.pdf]

## Supporting Information

### Porphyrin-Oligothiophene Conjugates as Additives for P3HT/PCBM Solar Cells

*Dani M. Lyons, Robert J. Ono, Christopher W. Bielawski and Jonathan L. Sessler\**

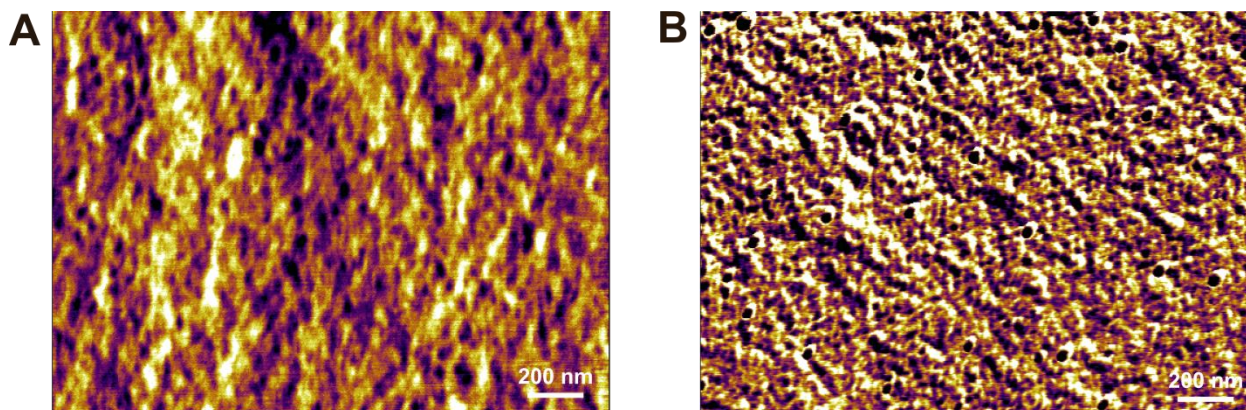

Figure S1. AFM phase images of A) P3HT/PCBM blended film, and B) a blended film containing P3HT/PCBM/1 wt% **3**.

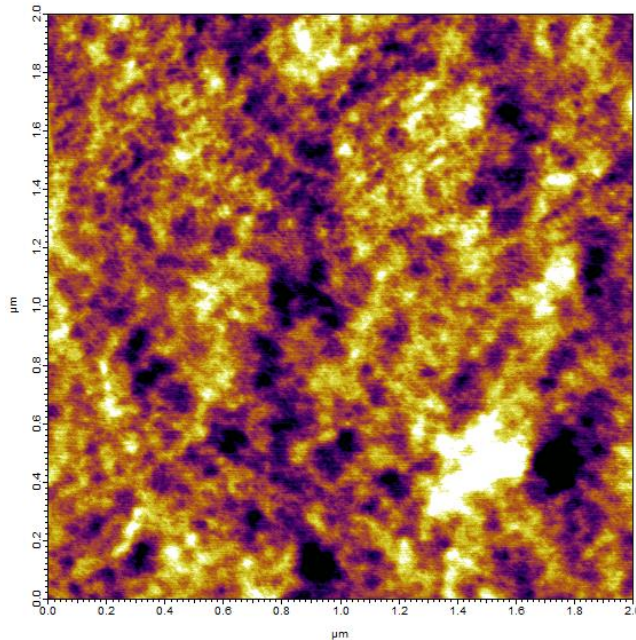

Figure S2. AFM phase image of a blended film containing P3HT/PCBM/1 wt% **11**/1 wt% **12**.
